# Supplementary material for: Formation of submicron-sized silica patterns on flexible polymer substrates based on vacuum ultraviolet photo-oxidation
Source: Royal Society of Chemistry journal article supplement (doi:10.1039/c9ra07256j), 2019-01-01
Supplement: c9ra07256j1.pdf [file c9ra07256j1.pdf]

## Supporting information

For

# Formation of submicron-sized silica patterns on flexible polymer substrates based on vacuum ultraviolet photo-oxidation

*Cheng-Tse Wu,<sup>a</sup> Ahmed I. A. Soliman,<sup>a,b</sup> Toru Utsunomiya,<sup>a</sup> Takashi Ichii,<sup>a</sup> Hiroyuki Sugimura<sup>a\*</sup>*

<sup>a</sup>Department of Materials Science and Engineering, Kyoto University, Yoshida-hommachi,  
Sakyo-ku, Kyoto 606-8501, Japan.

<sup>b</sup>Chemistry Department, Faculty of Science, Assiut University, Assiut 71516, Egypt.

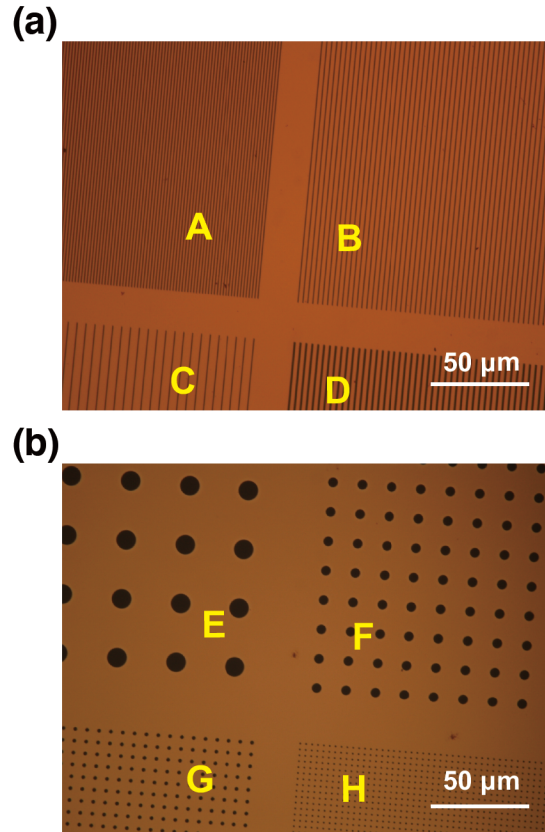

**Figure S1.** Optical micrographs of photomasks with (a) line patterns and (b) circular patterns. (a) Domain A, B, C, D represent the regions, which have (interval, line width) of (1  $\mu\text{m}$ , 0.5  $\mu\text{m}$ ), (2  $\mu\text{m}$ , 0.5  $\mu\text{m}$ ), (4  $\mu\text{m}$ , 0.5  $\mu\text{m}$ ), and (2  $\mu\text{m}$ , 1  $\mu\text{m}$ ), respectively. (b) Domain E, F, G, H represent the regions, which have circular patterns with diameters of 10  $\mu\text{m}$ , 5  $\mu\text{m}$ , 2  $\mu\text{m}$ , 1  $\mu\text{m}$ , respectively.

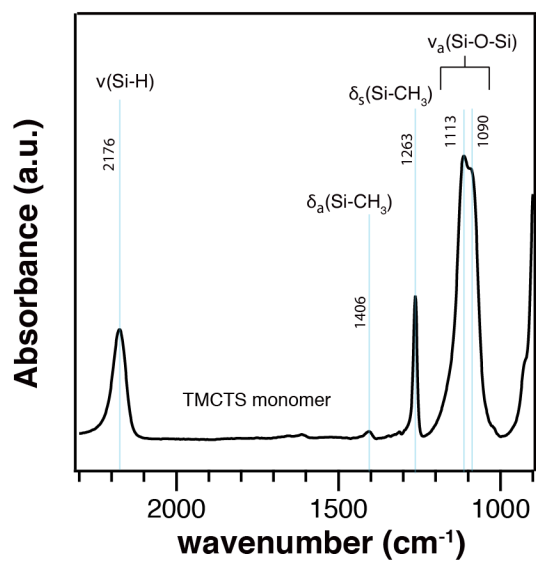

**Figure S2.** IR spectra of TMCTS monomer.
